# Supplementary material for: GTP binding to translation factor eIF2B stimulates its guanine nucleotide exchange activity
Source: PubMed Central journal article supplement (PMC8633983; doi:10.1016/j.isci.2021.103454), 2021-11-14

**iScience, Volume 24**

**Supplemental information**

**GTP binding to translation factor**

**eIF2B stimulates its guanine**

**nucleotide exchange activity**

**Christopher J. Kershaw, Martin D. Jennings, Francesco Cortopassi, Margherita Guaita, Hawra Al-Ghafli, and Graham D. Pavitt**

**Table S1. Yeast strains.**  
Related to STAR Methods.

| Yeast strain  | Genotype                                                                                                                                         | Reference               |
|---------------|--------------------------------------------------------------------------------------------------------------------------------------------------|-------------------------|
| GP3511        | <i>MATα ura3-52 leu2-3 leu2-112 ino1 pep4::LEU2 sui2Δ gcn2Δ ura3-52::P-HIS4-LacZ</i> pAV1089 [hc his6-GCD11 SUI2 SUI3 URA3 2μ]                   | Pavitt et al., 1998     |
| GP3750/H1905  | <i>MATα leu2-3 leu2-112 ura3-52 ino1 gcd6Δ gcn2Δ::hisG Ura3-52::HIS4-lacZ</i> [GCD6 CEN URA3]                                                    | Bushman et al., 1993    |
| GP3754        | <i>MATα leu2-3 leu2-112 trp1-Δ63 ura3-52 GAL2+ gcd1::LEU2 Ura3-52::HIS4-lacZ gcn2Δ</i> [GCD1 URA3 CEN]                                           | GP lab collection       |
| GP3583/BJ1995 | <i>MATα prb1-1122 pep4-3 leu2 trp1 ura3-52 gal2</i>                                                                                              | Jones, 1991             |
| GP4228        | <i>MATα leu2-3 leu2-112 ura3-52 ino1 gcd6Δ gcn2Δ::hisG Ura3-52::HIS4-lacZ</i> [gcd6(V57G) CEN LEU2] [URA3 CEN]                                   | Richardson et al., 2004 |
| GP4229        | <i>MATα leu2-3 leu2-112 ura3-52 ino1 gcd6Δ gcn2Δ::hisG Ura3-52::HIS4-lacZ</i> [gcd6(I90F) CEN LEU2] [URA3 CEN]                                   | Richardson et al., 2004 |
| GP4230        | <i>MATα leu2-3 leu2-112 ura3-52 ino1 gcd6Δ gcn2Δ::hisG Ura3-52::HIS4-lacZ</i> [gcd6(R284H) CEN LEU2] [URA3 CEN]                                  | Richardson et al., 2004 |
| GP4231        | <i>MATα leu2-3 leu2-112 ura3-52 ino1 gcd6Δ gcn2Δ::hisG Ura3-52::HIS4-lacZ</i> [gcd6(R323P) CEN LEU2] [URA3 CEN]                                  | Richardson et al., 2004 |
| GP4232        | <i>MATα leu2-3 leu2-112 ura3-52 ino1 gcd6Δ gcn2Δ::hisG Ura3-52::HIS4-lacZ</i> [gcd6(G369V) CEN LEU2] [URA3 CEN]                                  | Richardson et al., 2004 |
| GP4233        | <i>MATα leu2-3 leu2-112 ura3-52 ino1 gcd6Δ gcn2Δ::hisG Ura3-52::HIS4-lacZ</i> [gcd6(I413A) CEN LEU2] [URA3 CEN]                                  | Richardson et al., 2004 |
| GP4234        | <i>MATα leu2-3 leu2-112 ura3-52 ino1 gcd6Δ gcn2Δ::hisG Ura3-52::HIS4-lacZ</i> [gcd6(W618R) CEN LEU2] [URA3 CEN]                                  | Richardson et al., 2004 |
| GP4235        | <i>MATα leu2-3 leu2-112 ura3-52 ino1 gcd6Δ gcn2Δ::hisG Ura3-52::HIS4-lacZ</i> [GCD6 CEN LEU2] [URA3 CEN]                                         | Richardson et al., 2004 |
| GP4248        | <i>MATα leu2-3 leu2-112 ura3-52 ino1 gcd6Δ gcn2Δ::hisG Ura3-52::HIS4-lacZ</i> [GCD6 CEN LEU2] [GCN2 URA3 CEN]                                    | Richardson et al., 2004 |
| GP4763        | <i>MATα leu2-3 leu2-112 ura3-52 ino1 gcd6Δ gcn2Δ::hisG Ura3-52::HIS4-lacZ</i> [gcd6(D138A) CEN LEU2]                                             | Richardson et al., 2004 |
| GP4865        | <i>MATα leu2-3 leu2-112 ura3-52 ino1 gcd6Δ gcn2Δ::hisG Ura3-52::HIS4-lacZ</i> [gcd6(R39A) CEN LEU2]                                              | Reid et al., 2012       |
| GP4867        | <i>MATα leu2-3 leu2-112 ura3-52 ino1 gcd6Δ gcn2Δ::hisG Ura3-52::HIS4-lacZ</i> [GCD6 CEN LEU2]                                                    | Reid et al., 2012       |
| GP5122        | <i>MATα leu2-3 leu2-112 trp1-Δ63 ura3-52 GAL2+ gcd1::LEU2 Ura3-52::HIS4-lacZ gcn2Δ</i> pAV1418 [GCD1-FLAG2-His6 TRP CEN]                         | GP lab collection       |
| GP5949        | <i>MATα prb1-1122 pep4-3 leu2 trp1 ura3-52 gal2</i> pAV1353 [GCN3 GCD2 GCD7 URA3 2μm] pAV1413 [GCD1-FLAG2-His6 GCD6 LEU2 2μm]                    | GP lab collection       |
| GP7038        | <i>MATα leu2-3 leu2-112 trp1-Δ63 ura3-52 GAL2+ gcd1::LEU2 Ura3-52::HIS4-lacZ gcn2Δ</i> [GCD1 URA3 CEN] pAV7024 [gcd1(K66A)-FLAG2-His6 TRP1 CEN]  | In this study           |
| GP7039        | <i>MATα leu2-3 leu2-112 trp1-Δ63 ura3-52 GAL2+ gcd1::LEU2 Ura3-52::HIS4-lacZ gcn2Δ</i> [GCD1 URA3 CEN] pAV7025 [gcd1(K66D)-FLAG2-His6 TRP1 CEN]  | In this study           |
| GP7040        | <i>MATα leu2-3 leu2-112 trp1-Δ63 ura3-52 GAL2+ gcd1::LEU2 Ura3-52::HIS4-lacZ gcn2Δ</i> [GCD1 URA3 CEN] pAV7026 [gcd1(K66R)-FLAG2-His6 TRP1 CEN]  | In this study           |
| GP7041        | <i>MATα leu2-3 leu2-112 trp1-Δ63 ura3-52 GAL2+ gcd1::LEU2 Ura3-52::HIS4-lacZ gcn2Δ</i> [GCD1 URA3 CEN] pAV7028 [gcd1(D173A)-FLAG2-His6 TRP1 CEN] | In this study           |
| GP7042        | <i>MATα leu2-3 leu2-112 trp1-Δ63 ura3-52 GAL2+ gcd1::LEU2 Ura3-52::HIS4-lacZ gcn2Δ</i> [GCD1 URA3 CEN] pAV7029 [gcd1(D173K)-FLAG2-His6 TRP1 CEN] | In this study           |
| GP7043        | <i>MATα leu2-3 leu2-112 trp1-Δ63 ura3-52 GAL2+ gcd1::LEU2 Ura3-52::HIS4-lacZ gcn2Δ</i> [GCD1 URA3 CEN] pAV7030 [gcd1(D173N)-FLAG2-His6 TRP1 CEN] | In this study           |

|        |                                                                                                                                                           |               |
|--------|-----------------------------------------------------------------------------------------------------------------------------------------------------------|---------------|
| GP7044 | <i>MATa leu2-3 leu2-112 trp1-Δ63 ura3-52 GAL2+ gcd1::LEU2 Ura3-52::HIS4-lacZ gcn2Δ</i> pAV7024 [ <i>gcd1(K66A)</i> ]-FLAG2-His6 TRP CEN]                  | In this study |
| GP7045 | <i>MATa leu2-3 leu2-112 trp1-Δ63 ura3-52 GAL2+ gcd1::LEU2 Ura3-52::HIS4-lacZ gcn2Δ</i> pAV7025 [ <i>gcd1(K66D)</i> ]-FLAG2-His6 TRP1 CEN]                 | In this study |
| GP7046 | <i>MATa leu2-3 leu2-112 trp1-Δ63 ura3-52 GAL2+ gcd1::LEU2 Ura3-52::HIS4-lacZ gcn2Δ</i> pAV7026 [ <i>gcd1(K66R)</i> ]-FLAG2-His6 TRP1 CEN]                 | In this study |
| GP7047 | <i>MATa leu2-3 leu2-112 trp1-Δ63 ura3-52 GAL2+ gcd1::LEU2 Ura3-52::HIS4-lacZ gcn2Δ</i> pAV7028 [ <i>gcd1(D173A)</i> ]-FLAG2-His6 TRP1 CEN]                | In this study |
| GP7048 | <i>MATa leu2-3 leu2-112 trp1-Δ63 ura3-52 GAL2+ gcd1::LEU2 Ura3-52::HIS4-lacZ gcn2Δ</i> pAV7030 [ <i>gcd1(D173N)</i> ]-FLAG2-His6 TRP1 CEN]                | In this study |
| GP7289 | <i>MATa leu2-3 leu2-112 trp1-Δ63 ura3-52 GAL2+ gcd1::LEU2 Ura3-52::HIS4-lacZ gcn2Δ</i> pAV1418 [GCD1-FLAG2-His6 TRP CEN] [URA3 CEN]                       | In this study |
| GP7290 | <i>MATa leu2-3 leu2-112 trp1-Δ63 ura3-52 GAL2+ gcd1::LEU2 Ura3-52::HIS4-lacZ gcn2Δ</i> pAV1418 [GCD1-FLAG2-His6 TRP CEN] [GCN2 URA3 CEN]                  | In this study |
| GP7296 | <i>MATa leu2-3 leu2-112 trp1-Δ63 ura3-52 GAL2+ gcd1::LEU2 Ura3-52::HIS4-lacZ gcn2Δ</i> pAV2425 [ <i>gcd1(K66R)</i> ]-FLAG2-His6 TRP CEN] [GCN2 URA3 CEN]  | In this study |
| GP7298 | <i>MATa leu2-3 leu2-112 trp1-Δ63 ura3-52 GAL2+ gcd1::LEU2 Ura3-52::HIS4-lacZ gcn2Δ</i> pAV2426 [ <i>gcd1(D173A)</i> ]-FLAG2-His6 TRP CEN] [GCN2 URA3 CEN] | In this study |
| GP7050 | <i>MATα prb1-1122 pep4-3 leu2 trp1 ura3-52 gal2</i> pAV7033 [ <i>gcd1(K66D)</i> ]-FLAG2-His6 GCD6 LEU2 2μm] pAV1353 [GCN3 GCD2 GCD7 URA3 2μm]             | In this study |
| GP7051 | <i>MATα prb1-1122 pep4-3 leu2 trp1 ura3-52 gal</i> pAV7034 [ <i>gcd1(K66R)</i> ]-FLAG2-His6 GCD6 LEU2 2μm] pAV1353 [GCN3 GCD2 GCD7 URA3 2μm]              | In this study |
| GP7321 | <i>MATa leu2-3 leu2-112 trp1-Δ63 ura3-52 GAL2+ gcd1::LEU2 Ura3-52::HIS4-lacZ gcn2Δ</i> pAV2371 [ <i>gcd1(G12V)</i> ]-FLAG2-His6 TRP CEN]                  | In this study |
| GP7322 | <i>MATa leu2-3 leu2-112 trp1-Δ63 ura3-52 GAL2+ gcd1::LEU2 Ura3-52::HIS4-lacZ gcn2Δ</i> pAV2371 [ <i>gcd1(L480Q)</i> ]-FLAG2-His6 TRP CEN]                 | In this study |
| GP7329 | <i>MATα leu2-3 leu2-112 ura3-52 ino1 gcd6Δ gcn2Δ::hisG Ura3-52::HIS4-lacZ</i> [ <i>gcd6(R39D)</i> LEU2 CEN]                                               | In this study |
| GP7330 | <i>MATα leu2-3 leu2-112 ura3-52 ino1 gcd6Δ gcn2Δ::hisG Ura3-52::HIS4-lacZ</i> [ <i>gcd6(R39E)</i> LEU2 CEN]                                               | In this study |
| GP7331 | <i>MATα leu2-3 leu2-112 ura3-52 ino1 gcd6Δ gcn2Δ::hisG Ura3-52::HIS4-lacZ</i> [ <i>gcd6(R39K)</i> LEU2 CEN]                                               | In this study |
| GP7332 | <i>MATα leu2-3 leu2-112 ura3-52 ino1 gcd6Δ gcn2Δ::hisG Ura3-52::HIS4-lacZ</i> [ <i>gcd6(D138K)</i> LEU2 CEN]                                              | In this study |
| GP7333 | <i>MATα leu2-3 leu2-112 ura3-52 ino1 gcd6Δ gcn2Δ::hisG Ura3-52::HIS4-lacZ</i> [ <i>gcd6(D138N)</i> LEU2 CEN]                                              | In this study |
| GP7335 | <i>MATa leu2-3 leu2-112 trp1-Δ63 ura3-52 GAL2+ gcd1::LEU2 Ura3-52::HIS4-lacZ gcn2Δ</i> pAV2371 [ <i>gcd1(L480Q)</i> ]-FLAG2-His6 TRP CEN] [URA3 CEN]      | In this study |

**Table S2. Plasmids used.**

Related to STAR Methods.

| <b>Plasmids</b>   | <b>Genotype</b>                                                 | <b>Reference</b>               |
|-------------------|-----------------------------------------------------------------|--------------------------------|
| pAV1193 (pRS314)  | <i>TRP1 CEN</i>                                                 | Sikorski and Hieter, 1989      |
| pAV1195 (pRS316)  | <i>URA3 CEN</i>                                                 | Sikorski and Hieter, 1989      |
| pAV1163/ p256     | <i>GCD1 URA3 CEN</i>                                            | Hill and Struhl, 1988          |
| pAV1198/ p722     | <i>GCN2 URA3 CEN</i>                                            | Wek et al., 1990               |
| pAV1265/pJB102    | <i>GCD6 LEU2 CEN</i>                                            | Bushman et al., 1993           |
| pAV1353 (pY24)    | <i>GCN3 GCD2 GCD7 URA3 2<math>\mu</math>m</i>                   | Yang and Hinnebusch, 1996      |
| pAV1413 (pTK11.1) | <i>GCD1-FLAG2-His6 GCD6 LEU2 2<math>\mu</math>m</i>             | Krishnamoorthy et al., 2001    |
| pAV1418           | <i>GCD1-FLAG2-His6 TRP CEN</i>                                  | Mohammad-Qureshi et al., 2007b |
| pAV1427           | <i>P<sub>GAL1</sub>-FLAG-His6-GCD6 URA3 2 <math>\mu</math>m</i> | Mohammad-Qureshi et al., 2007a |
| pAV1739           | <i>gcd6(V57G) LEU2 CEN</i>                                      | Richardson et al., 2004        |
| pAV1740           | <i>gcd6(I90F) LEU2 CEN</i>                                      | Richardson et al., 2004        |
| pAV1741           | <i>gcd6(R323P) LEU2 CEN</i>                                     | Richardson et al., 2004        |
| pAV1742           | <i>gcd6(G369V) LEU2 CEN</i>                                     | Richardson et al., 2004        |
| pAV1743           | <i>gcd6(I413A) LEU2 CEN</i>                                     | Richardson et al., 2004        |
| pAV1744           | <i>gcd6(R284H) LEU2 CEN</i>                                     | Richardson et al., 2004        |
| pAV1745           | <i>gcd6(W618R) LEU2 CEN</i>                                     | Richardson et al., 2004        |
| pAV1857           | <i>gcd6(D138A) LEU2 CEN</i>                                     | Reid et al., 2012              |
| pAV1895           | <i>gcd6(R39A) LEU2 CEN</i>                                      | Reid et al., 2012              |
| pAV2371           | <i>gcd1(G12V)-FLAG2-His6 TRP1 CEN</i>                           | In this study                  |
| pAV2372           | <i>gcd1(L480Q)-FLAG2-His6 TRP1 CEN</i>                          | In this study                  |
| pAV2416           | <i>GCD1 GCD6-FLAG2 LEU2 2<math>\mu</math>m</i>                  | Adomavicius et al., 2019       |
| pAV2423           | <i>gcd1(K66A)-FLAG2-His6 TRP1 CEN</i>                           | In this study                  |
| pAV2424           | <i>gcd1(K66D)-FLAG2-His6 TRP1 CEN</i>                           | In this study                  |
| pAV2425           | <i>gcd1(K66R)-FLAG2-His6 TRP1 CEN</i>                           | In this study                  |
| pAV2426           | <i>gcd1(D173A)-FLAG2-His6 TRP1 CEN</i>                          | In this study                  |
| pAV2427           | <i>gcd1(D173K) -FLAG2-His6 TRP1 CEN</i>                         | In this study                  |
| pAV2428           | <i>gcd1(D173N)-FLAG2-His6 TRP1 CEN</i>                          | In this study                  |
| pAV2429           | <i>gcd1(K66A)-FLAG2-His6 GCD6 LEU2 2<math>\mu</math>m</i>       | In this study                  |
| pAV2430           | <i>gcd1(K66D)-FLAG2-His6 GCD6 LEU2 2<math>\mu</math>m</i>       | In this study                  |
| pAV2431           | <i>gcd1(K66R)-FLAG2-His6 GCD6 LEU2 2<math>\mu</math>m</i>       | In this study                  |
| pAV2539           | <i>gcd6(R39D) LEU2 CEN</i>                                      | In this study                  |
| pAV2540           | <i>gcd6(R39E) LEU2 CEN</i>                                      | In this study                  |
| pAV2541           | <i>gcd6(R39K) LEU2 CEN</i>                                      | In this study                  |
| pAV2542           | <i>gcd6(D138K) LEU2 CEN</i>                                     | In this study                  |
| pAV2543           | <i>gcd6(D138N) LEU2 CEN</i>                                     | In this study                  |

**Figure S1. Competition between purine nucleotides for binding to eIF2B.**

Related to Figure 1

(A) Gel of Flag purified proteins used in Figure 1.

(B) Excess GDP can displace  $^{32}\text{P}$ GTP from eIF2B.

**Figure S2. Control GEF assays.**

Related to Figure 2

(A) Example single concentration GEF assay  $\pm$  eIF2B.

(B) Unlabelled nucleotides (1 mM) do not alter the eIF2B-independent rate of Bodipy-GDP release from eIF2. Mean normalised GDP release rate  $\pm$  s.e.m (n=3). None are significantly different (T-test) from reactions without nucleotide (- nt)

**Figure S3. Alignment and structural models of eIF2B and HNPs.**

Related to Figure 3

(A) Structural overview and nucleotide-binding pocket detail of ADP-glucose pyrophosphorylase bound to ATP (pink) (Pdb file 1YP3) showing key conserved nucleotide-binding residues (red surface).

(B) As panel (A) except GDP-mannose pyrophosphorylase bound to GTP (2X60, salmon color).

(C) Clustal W (Sievers et al., 2011) multi-sequence alignment highlighting conservation of nucleotide binding residues in HNPs and eIF2B  $\gamma$  and  $\epsilon$  sequences.

(D) Structural overlays of eIF2B $\gamma$  (green) with the HNPs shown in panel (A).

(E and F) GTP modelling from 2X60 onto eIF2B $\gamma$  (E) and eIF2B $\epsilon$  (F). Structural analysis and images used UCSFChimera software version 1.15 (Pettersen et al., 2004).

**Figure S4. Expression and eIF2B complex formation for eIF2B $\gamma$  K66 and D173 mutants.**

Related to Figure 3.

(A) Example western blot of Flag-eIF2B $\gamma$  from extracts of cells expressing indicated WT or mutant variants as sole source of *GCD1*, except for lethal D173K (marked \*), where pre-shuffle cells containing both untagged *GCD1* and Flag-*gcd1-D173K* were analysed. Right, quantification of three replicate experiments relative to a loading control antibody, normalised so WT=1. Error shown is standard deviation from the mean.

(B) Input and Co-IP of eIF2 with flag-eIF2B showing all four untagged eIF2B subunits and eIF2 co-purify with Flag-eIF2B $\gamma$  in low salt (100 mM KCl) buffer. '-' indicates a WT *GCD1* strain negative control lacking the Flag tag.

**Figure S5. No effect of guanine or adenine on growth of other eIF2B $\gamma$  or eIF2B $\epsilon$  mutations.** Related to Figure 4.

(A) *GCD1*(eIF2B $\gamma$ ) mutations spotted over a range of nucleotide concentrations  $\pm$ 3AT. 0 and 300  $\mu\text{M}$  concentrations are also shown in Figure 4.

(B) *GCD6* (eIF2B $\epsilon$ ) mutations.

**Data S1. Source uncropped Western blot images**

Relates to Figure 5A

Uncropped blots with anti-Flag and anti-Sui2 antibodies.

Figure S1

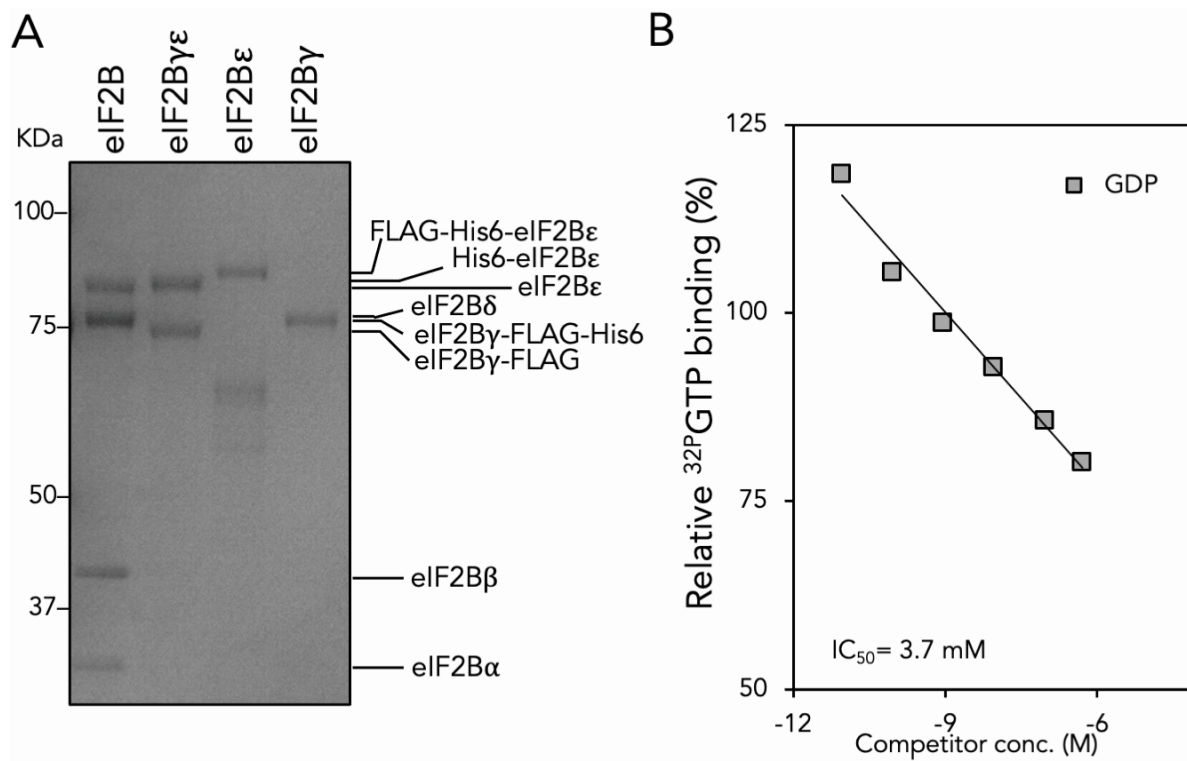

Figure S2

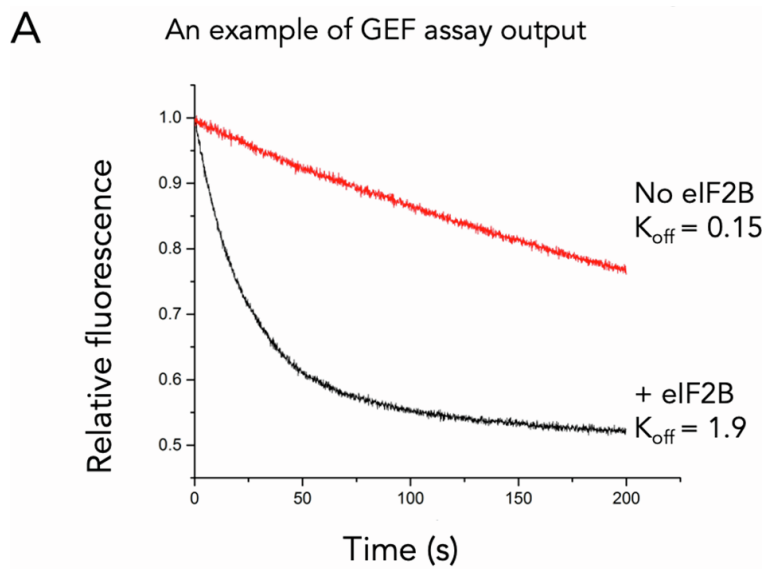

**B** Relative eIF2B independent rate of Bodipy-GDP release from eIF2

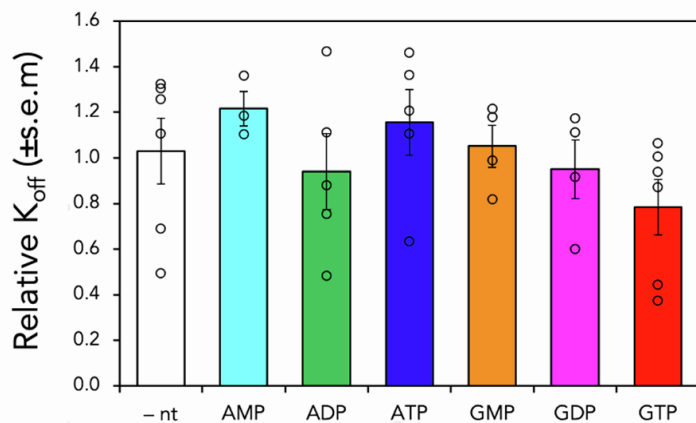



Figure S3

A

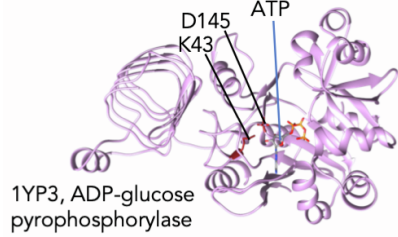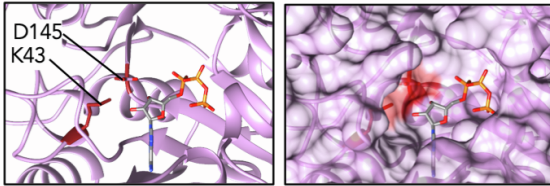

B

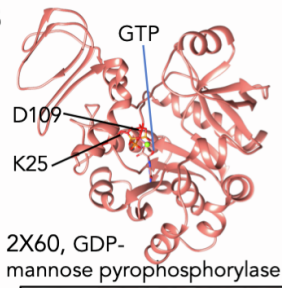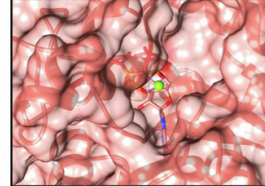

C

|                               |                         |                           |
|-------------------------------|-------------------------|---------------------------|
| <b>PPPases</b>                | t tsss.HHHseess         | .tTseEEEEETtee.t.hHH      |
| 1YP3_AGP_Potato_ATP           | L-TKKRAKPAVPLGA 50 (84) | HTVLEYLILAGDHLYRMDYEK 154 |
| 2X60_T.mar_GDP-mann-ppase_GTP | LSTPETPKQFLKLF 32 (65)  | DDDEPVLVLPADHRIPTTKKF 118 |
| <b>eIF2BY</b>                 | .s.sss.hhh.ss s         | t..sEEEEEttee.s.hhh       |
| 2By_S.cerevisiae              | QHSTRLPKALLPI-G 72 (89) | RINGDFVILPCDFVTDIPPQV 182 |
| 2By_Sch.pombe                 | TGSDALPKALLPI-G 68 (69) | LIRKDFVCLSCDSIVGLPPIY 158 |
| 2By_D.melanogast              | V-LGDAPKCLLPV-G 32 (67) | KIKSDFLVVSCDLVSNVSLYP 120 |
| 2By_D.rerio                   | L-TYNTPKLLPV-G 31 (68)  | KIKTDLVLVSCDLITDVALHE 120 |
| 2By_X.tropicalis              | L-TASIPKLLPV-G 33 (67)  | KIKTDVLTSCDLITEVALHE 121  |
| 2By_G.gallus                  | L-TSSIPKLLPV-G 31 (62)  | KIKTDVVLVSCDLITDVLK 114   |
| 2By_H.sapiens                 | L-TSSIPKLLPV-G 31 (64)  | KLKTDVVLVSCDLITDVALHE 116 |
| <b>eIF2Bε</b>                 | t tsss.HHHsbs s         | ...s.EEEEEttee...hhh      |
| 2Bε_S.cerevisiae              | L-TAVKPRCLLPL-A 55 (71) | IITGDFILVSGDVLTNIDFSK 147 |
| 2Bε_Sch.pombe                 | L-TLDKPRCLLPL-A 46 (71) | LITSDFILVSGDVVSNVPLNE 138 |
| 2Bε_D.melanogaster            | L-SDEGSTALLPL-V 37 (73) | LIRGHFILLGADTVTNADLRP 131 |
| 2Bε_D.rerio                   | I-TKDQPRALLPL-A 53 (71) | LVRSDFLLVYGDVSNVDVQS 145  |
| 2Bε_X.tropicalis              | I-TKDRPRALIPL-A 67 (71) | LVRSDFILVTGDVSNINIEA 159  |
| 2Bε_G.gallus                  | I-SKDRPRALLPM-A 57 (71) | LVRSDFILVTGDVSNLNISR 149  |
| 2Bε_H.sapiens                 | I-SKDQPRVLLPL-A 71 (71) | LVRSDFLLVYGDVISNINIR 163  |

D

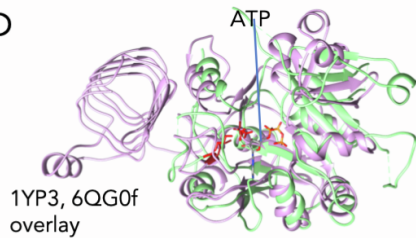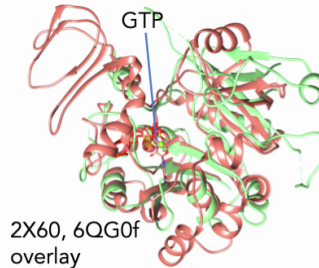

E

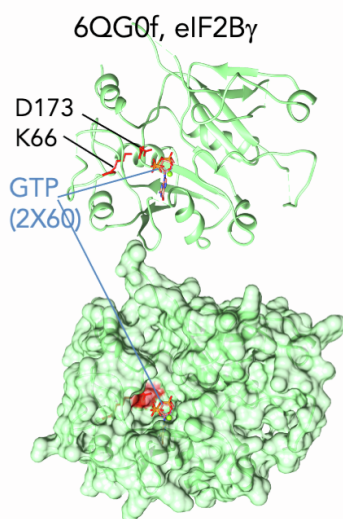

F

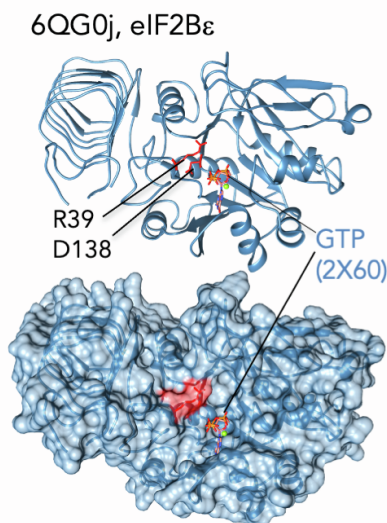



Figure S4

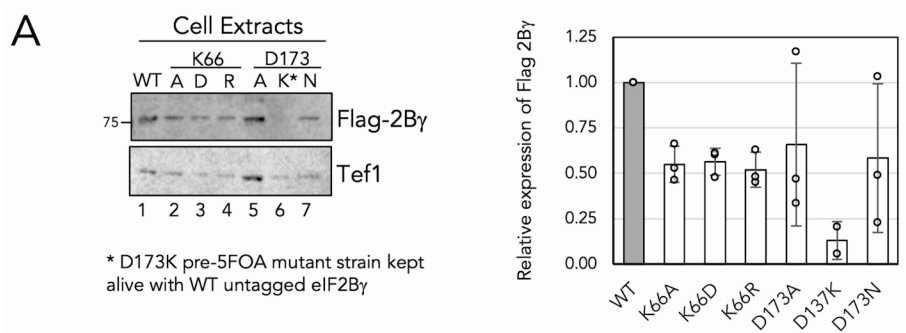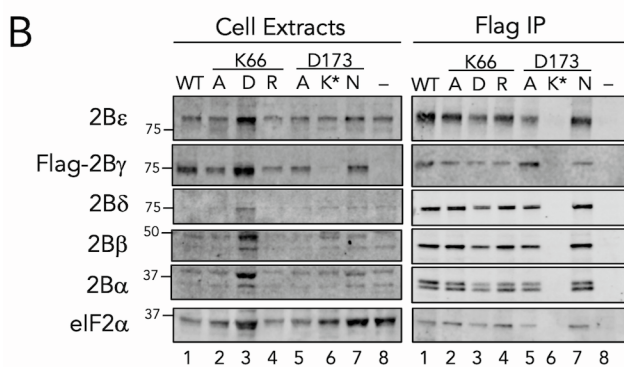



## Data S1

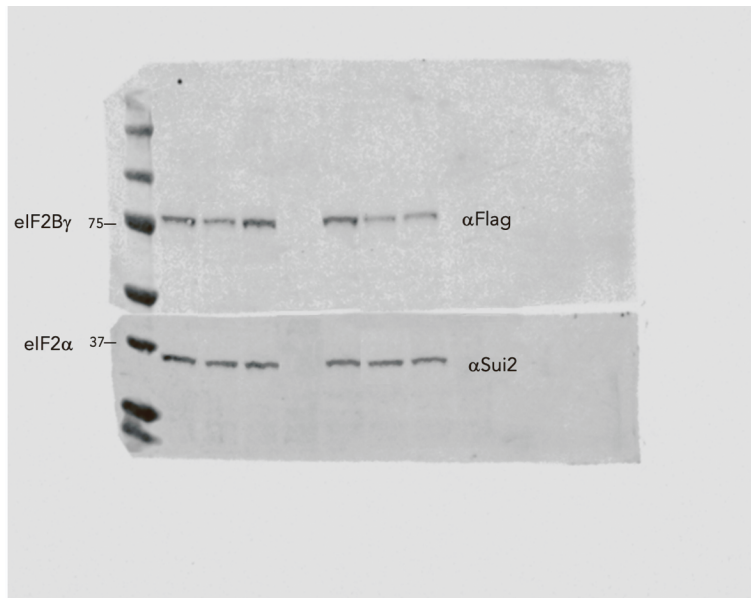

Supplement: mmc1.pdf [file mmc1.pdf]
